# Supplementary material for: A nutrient-dependent division antagonist is regulated post-translationally by the Clp proteases in Bacillus subtilis
Source: PubMed Central journal article supplement (PMC5889556; doi:10.1186/s12866-018-1155-2), 2018-04-06

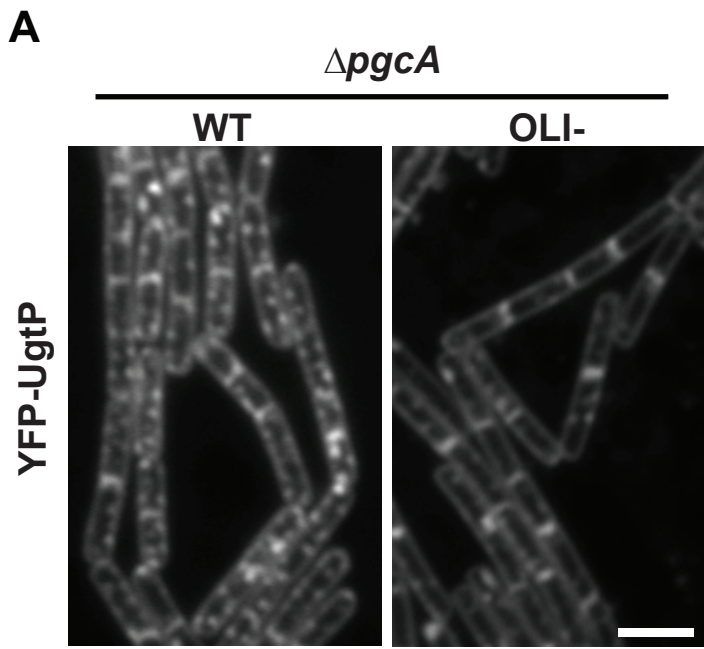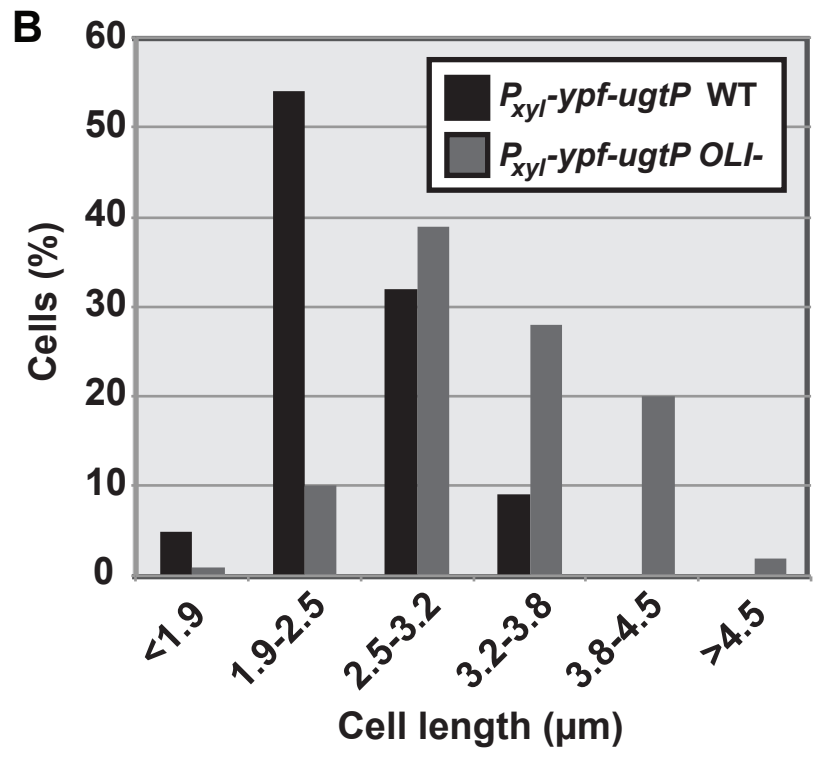

Supplement: 12866_2018_1155_MOESM3_ESM.pdf [file 12866_2018_1155_MOESM3_ESM.pdf]
