# Supplementary material for: A nutrient-dependent division antagonist is regulated post-translationally by the Clp proteases in Bacillus subtilis
Source: PubMed Central journal article supplement (PMC5889556; doi:10.1186/s12866-018-1155-2), 2018-04-06

|          |    |     |    |     |    |     |
|----------|----|-----|----|-----|----|-----|
| ClpXP    | +  | +   | +  | +   | +  | +   |
| ATP      | +  | +   | -  | -   | +  | +   |
| Time     | 0' | 60' | 0' | 60' | 0' | 60' |
| Spx      | +  | +   | +  | +   | -  | -   |
| Thio-His | -  | -   | -  | -   | +  | +   |

Substrate

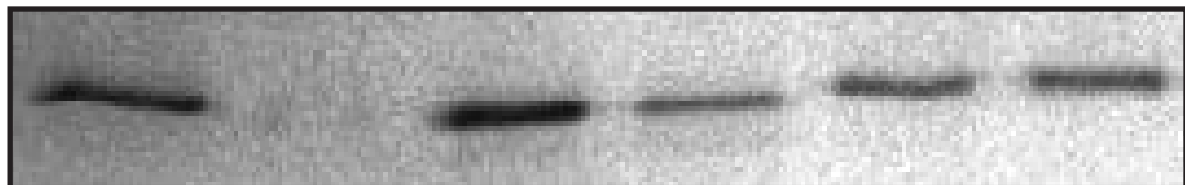

Supplement: 12866_2018_1155_MOESM6_ESM.pdf [file 12866_2018_1155_MOESM6_ESM.pdf]
